# Supplementary material
Source: Springer Nature journal article supplement (https://www.springermedizin.de/resource/supplementary/12947_2006_118_MOESM4_ESM.pdf/9556248)

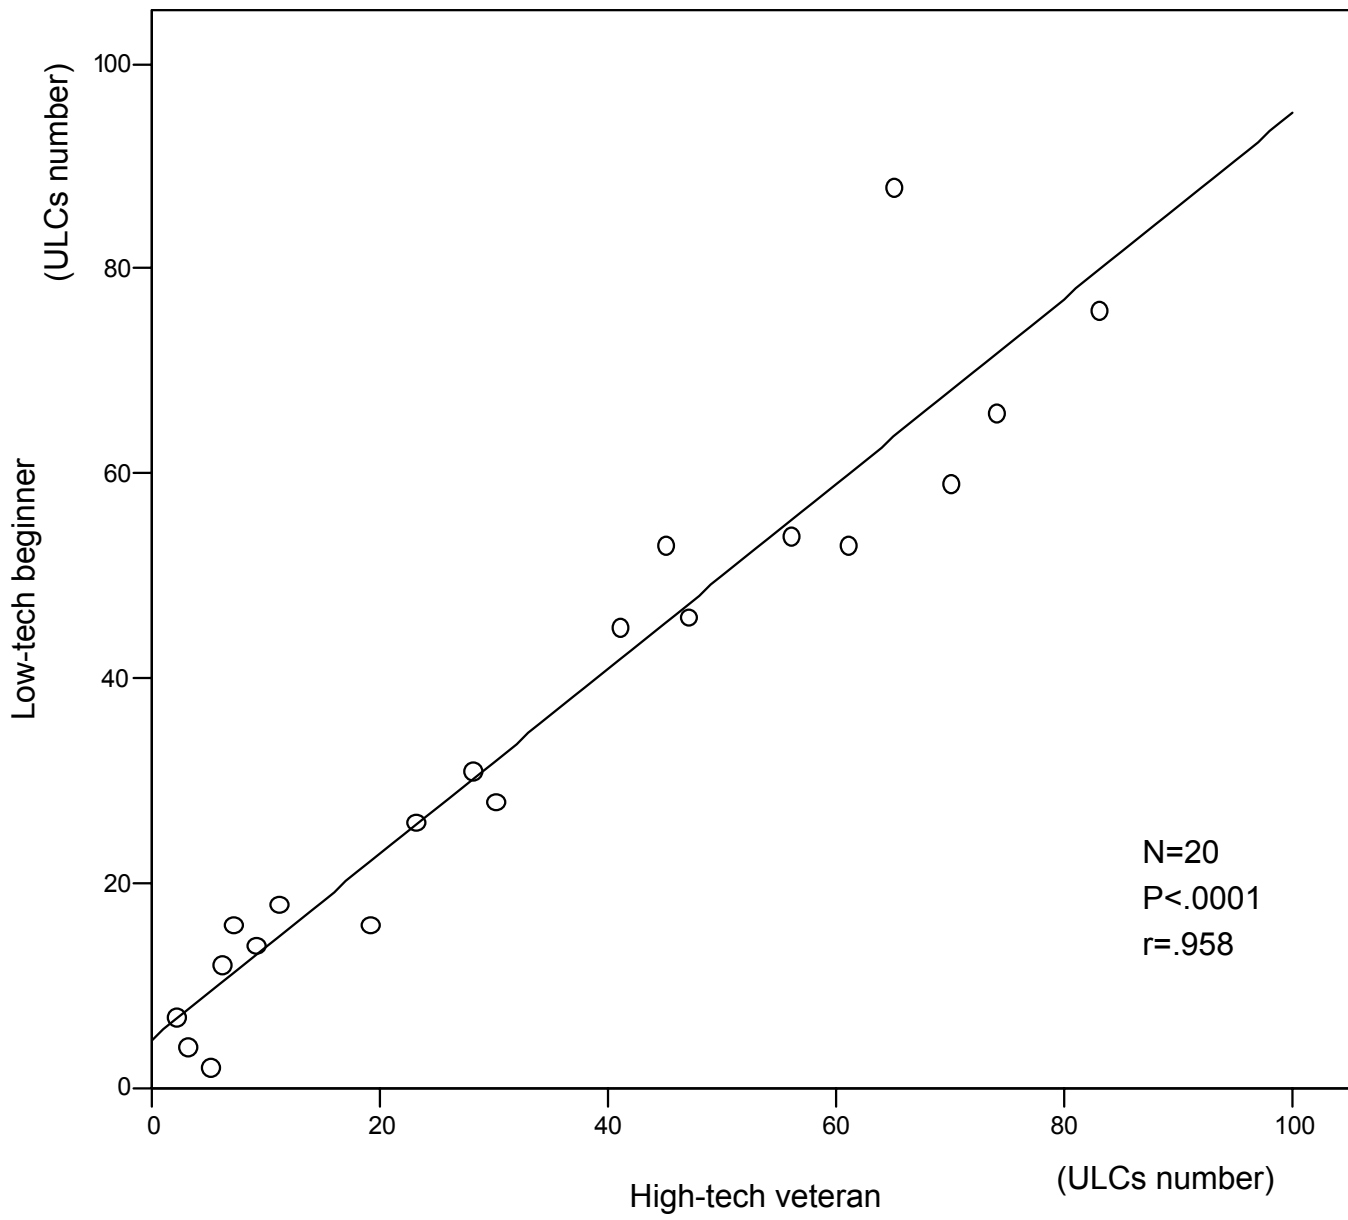

Supplement: MOESM4 [file 9556248]
